# Supplementary material for: Tuning the thermodynamic stability of oxothiomolybdenum wheels: crystal structures, studies in solution and DFT calculations
Source: Royal Society of Chemistry journal article supplement (doi:10.1039/b801716f), 2008-01-01
Supplement: b801716f.pdf [file b801716f.pdf]

**Tuning the thermodynamic stability of oxothiomolybdenum wheels: crystal structures, studies in solution and DFT calculations**

Jean-François Lemonnier,<sup>a</sup> Ali Kachmar,<sup>b</sup> Sébastien Floquet,<sup>\*,a</sup> Jérôme Marrot,<sup>a</sup>

Marie-Madeleine Rohmer,<sup>\*,b</sup> Marc Bénard,<sup>b</sup> and Emmanuel Cadot<sup>a</sup>

a - Institut Lavoisier de Versailles, UMR 8180, University of Versailles, 45 avenue des Etats-Unis, 78035 Versailles, France. E-mail : [sebastien.floquet@chimie.uvsq.fr](mailto:sebastien.floquet@chimie.uvsq.fr).

b - Laboratoire de Chimie Quantique, Institut de Chimie-UMR 7177, CNRS-ULP, 4 rue Blaise Pascal, 67000 Strasbourg, France. E-mail : [mmrohmer@quantix.u-strasbg.fr](mailto:mmrohmer@quantix.u-strasbg.fr).

***Supporting Information***

**Table S1** Final proportions of molybdenum complexes in mixtures  $\text{Mo}_{12}:\text{L1}^{n-}:\text{L2}^{n-}$  in 1:1:1 ratio. The uncertainties are estimated to be about  $\pm 0.02$  excepted for mixture 7 ( $\pm 0.05$ ) due to the strong overlap between the NMR signals of the free ligand and of the host-guest complex.

| Mixtures | $\text{L1}^{n-}$   | $\text{L2}^{n-}$   | % $[\text{Mo}_{12}\text{L1}]^{n-}$ | % $[\text{Mo}_{12}\text{L2}]^{n-}$ |
|----------|--------------------|--------------------|------------------------------------|------------------------------------|
| 1        | Adip <sup>2-</sup> | Sub <sup>2-</sup>  | 0.95(2)                            | 0.05(2)                            |
| 2        | Adip <sup>2-</sup> | Pim <sup>2-</sup>  | 0.95(2)                            | 0.05(2)                            |
| 3        | Adip <sup>2-</sup> | Muco <sup>2-</sup> | 0.20(2)                            | 0.80(2)                            |
| 4        | Adip <sup>2-</sup> | TerP <sup>2-</sup> | 0.52(2)                            | 0.48(2)                            |
| 5        | Adip <sup>2-</sup> | TMT <sup>2-</sup>  | 0.10(2)                            | 0.90(2)                            |
| 6        | Adip <sup>2-</sup> | Trim <sup>3-</sup> | 0.00(2)                            | 1.00(2)                            |
| 7        | Pim <sup>2-</sup>  | Sub <sup>2-</sup>  | 0.85(5)                            | 0.15(5)                            |
| 8        | Pim <sup>2-</sup>  | TerP <sup>2-</sup> | 0.13(2)                            | 0.87(2)                            |
| 9        | Pim <sup>2-</sup>  | Trim <sup>3-</sup> | 0.00(2)                            | 1.00(2)                            |
| 10       | Sub <sup>2-</sup>  | TerP <sup>2-</sup> | 0.05(2)                            | 0.95(2)                            |
| 11       | Sub <sup>2-</sup>  | Trim <sup>3-</sup> | 0.00(2)                            | 1.00(2)                            |
| 12       | Muco <sup>2-</sup> | TerP <sup>2-</sup> | 0.78(2)                            | 0.22(2)                            |
| 13       | Muco <sup>2-</sup> | TMT <sup>2-</sup>  | 0.20(2)                            | 0.80(2)                            |
| 14       | Muco <sup>2-</sup> | Trim <sup>3-</sup> | 0.00(2)                            | 1.00(2)                            |
| 15       | TerP <sup>2-</sup> | TMT <sup>2-</sup>  | 0.00(2)                            | 1.00(2)                            |
| 16       | TerP <sup>2-</sup> | Trim <sup>3-</sup> | 0.00(2)                            | 1.00(2)                            |
| 17       | TMT <sup>2-</sup>  | Trim <sup>3-</sup> | 0.00(2)                            | 1.00(2)                            |

**Bond energies and optimized geometries computed for host-guest complexes (without solvent)**

(Adipate)<sup>2-</sup>@[Mo<sub>12</sub>O<sub>12</sub>S<sub>12</sub>(OH)<sub>12</sub>] (C<sub>2</sub> symmetry, Figure 7a)

78 atoms; Bond energy: -519.6581 eV

|    |           |           |           |
|----|-----------|-----------|-----------|
| Mo | 6.565597  | 0.053557  | 0.026212  |
| Mo | 0.198067  | 5.560235  | 0.007811  |
| Mo | -0.198067 | -5.560235 | 0.007811  |
| Mo | 2.987826  | 5.035511  | 0.012418  |
| Mo | -2.987826 | -5.035511 | 0.012418  |
| Mo | 5.526637  | 2.671035  | 0.023157  |
| Mo | -5.526637 | -2.671035 | 0.023157  |
| Mo | -6.565597 | -0.053557 | 0.026212  |
| Mo | 5.502047  | -3.158923 | 0.018302  |
| Mo | -5.502047 | 3.158923  | 0.018302  |
| Mo | 3.181516  | -4.786154 | 0.011033  |
| Mo | -3.181516 | 4.786154  | 0.011033  |
| S  | 1.505454  | 4.924812  | 1.836946  |
| S  | 5.937492  | 1.327627  | 1.908109  |
| S  | 4.095922  | -3.667419 | 1.845259  |
| S  | 1.509953  | 4.913657  | -1.814802 |
| S  | 5.943362  | 1.325390  | -1.858509 |
| S  | 4.097618  | -3.653874 | -1.813780 |
| S  | -1.505454 | -4.924812 | 1.836946  |
| S  | -5.937492 | -1.327627 | 1.908109  |
| S  | -4.095922 | 3.667419  | 1.845259  |
| S  | -1.509953 | -4.913657 | -1.814802 |
| S  | -5.943362 | -1.325390 | -1.858509 |
| S  | -4.097618 | 3.653874  | -1.813780 |
| O  | 0.120170  | 7.258635  | 0.003411  |
| O  | 3.652931  | 6.599169  | 0.009894  |
| O  | 6.877202  | 3.717988  | 0.025044  |
| O  | 8.271907  | 0.183434  | 0.028754  |
| O  | 6.686755  | -4.376290 | 0.015293  |
| O  | 3.828504  | -6.358949 | 0.005419  |
| O  | -0.120170 | -7.258635 | 0.003411  |
| O  | -3.652931 | -6.599169 | 0.009894  |
| O  | -6.877202 | -3.717988 | 0.025044  |
| O  | -8.271907 | -0.183434 | 0.028754  |
| O  | -6.686755 | 4.376290  | 0.015293  |
| O  | -3.828504 | 6.358949  | 0.005419  |
| O  | 4.239158  | 3.899668  | 1.241324  |
| H  | 3.812704  | 3.424301  | 1.977145  |
| O  | 6.381203  | -1.709672 | 1.260524  |
| H  | 5.840422  | -1.502937 | 2.045421  |
| O  | -1.418477 | 4.877320  | 1.175353  |
| H  | -1.347557 | 4.591149  | 2.102821  |
| O  | 4.245538  | 3.896216  | -1.206363 |
| H  | 3.823388  | 3.418434  | -1.943021 |
| O  | 6.383560  | -1.704245 | -1.214383 |
| H  | 5.847440  | -1.494011 | -2.001506 |

|   |           |           |           |
|---|-----------|-----------|-----------|
| O | -1.417489 | 4.867280  | -1.154612 |
| H | -1.348669 | 4.585448  | -2.083562 |
| O | -4.239158 | -3.899668 | 1.241324  |
| H | -3.812704 | -3.424301 | 1.977145  |
| O | -6.381203 | 1.709672  | 1.260524  |
| H | -5.840422 | 1.502937  | 2.045421  |
| O | 1.418477  | -4.877320 | 1.175353  |
| H | 1.347557  | -4.591149 | 2.102821  |
| O | -4.245538 | -3.896216 | -1.206363 |
| H | -3.823388 | -3.418434 | -1.943021 |
| O | -6.383560 | 1.704245  | -1.214383 |
| H | -5.847440 | 1.494011  | -2.001506 |
| O | 1.417489  | -4.867280 | -1.154612 |
| H | 1.348669  | -4.585448 | -2.083562 |
| C | 3.271244  | 0.206127  | 0.026852  |
| C | 1.900925  | -0.478229 | 0.029116  |
| H | 1.896331  | -1.147624 | 0.905359  |
| H | 1.896780  | -1.152571 | -0.843395 |
| C | 0.653228  | 0.409076  | 0.026337  |
| H | 0.676544  | 1.075203  | 0.903669  |
| H | 0.677917  | 1.073208  | -0.852438 |
| C | -0.653228 | -0.409076 | 0.026337  |
| H | -0.676544 | -1.075203 | 0.903669  |
| H | -0.677917 | -1.073208 | -0.852438 |
| C | -1.900925 | 0.478229  | 0.029116  |
| H | -1.896331 | 1.147624  | 0.905359  |
| H | -1.896780 | 1.152571  | -0.843395 |
| C | -3.271244 | -0.206127 | 0.026852  |
| O | 3.359903  | 1.471461  | 0.022880  |
| O | 4.276257  | -0.596178 | 0.029031  |
| O | -3.359903 | -1.471461 | 0.022880  |
| O | -4.276257 | 0.596178  | 0.029031  |

(Adipate, H<sub>2</sub>O)<sup>2-</sup>@[Mo<sub>12</sub>O<sub>12</sub>S<sub>12</sub>(OH)<sub>12</sub>] (C<sub>1</sub> symmetry, Figure 7b)

81 atoms; Bond energy: -533.8943 eV

|    |           |           |           |
|----|-----------|-----------|-----------|
| Mo | 4.998865  | -3.161528 | 0.019171  |
| Mo | 6.596843  | -0.805911 | -0.047577 |
| Mo | 5.980918  | 2.509151  | -0.042750 |
| Mo | 3.864655  | 4.425296  | -0.010769 |
| Mo | 0.551167  | 5.532029  | 0.022505  |
| Mo | -2.295339 | 5.370297  | 0.034689  |
| Mo | -5.105593 | 3.312840  | 0.017172  |
| Mo | -6.277898 | 0.730905  | -0.024140 |
| Mo | -5.780414 | -2.697616 | -0.046366 |
| Mo | -3.896472 | -4.833319 | -0.038186 |
| Mo | -0.584719 | -6.061645 | 0.030513  |
| Mo | 2.157209  | -5.220959 | 0.060439  |
| S  | 5.637367  | -1.930217 | -1.882189 |
| S  | 5.750906  | -1.902806 | 1.859528  |
| S  | 4.651073  | 3.232683  | -1.858901 |
| S  | 4.689679  | 3.211262  | 1.808257  |
| S  | -0.840848 | 5.071247  | -1.797355 |
| S  | -0.822771 | 5.014114  | 1.841768  |
| S  | -5.613972 | 1.958407  | 1.875601  |
| S  | -5.610612 | 2.019398  | -1.883677 |
| S  | -4.466153 | -3.465300 | -1.849141 |

Electronic Supplementary Information for Dalton Transactions  
This journal is © The Royal Society of Chemistry 2008

|   |           |           |           |
|---|-----------|-----------|-----------|
| S | -4.535521 | -3.511079 | 1.781565  |
| S | 0.681816  | -5.454463 | 1.914103  |
| S | 0.732557  | -5.463532 | -1.804294 |
| O | 6.101084  | -4.461212 | -0.001499 |
| O | 8.232058  | -1.298586 | -0.096158 |
| O | 7.309276  | 3.568344  | -0.053572 |
| O | 4.671192  | 5.922068  | -0.002729 |
| O | 0.816729  | 7.210407  | 0.050849  |
| O | -2.709668 | 7.016579  | 0.063845  |
| O | -6.386657 | 4.446286  | 0.048689  |
| O | -7.977053 | 0.940550  | -0.036783 |
| O | -7.216747 | -3.601564 | -0.066962 |
| O | -4.932539 | -6.179993 | -0.088512 |
| O | -0.626245 | -7.761344 | 0.029109  |
| O | 2.992622  | -6.705077 | 0.099652  |
| O | 3.459401  | -4.016466 | 1.245392  |
| H | 3.603182  | -4.178767 | 2.194048  |
| O | 3.431642  | -4.056964 | -1.141941 |
| H | 3.122352  | -3.644176 | -1.967395 |
| O | 6.766275  | 0.965669  | 1.175439  |
| H | 6.257483  | 0.840479  | 1.999332  |
| O | 6.723851  | 0.964306  | -1.288708 |
| H | 6.178587  | 0.840311  | -2.088864 |
| O | 2.101359  | 4.710183  | -1.158897 |
| H | 2.020350  | 4.490567  | -2.104189 |
| O | 2.106969  | 4.654123  | 1.157582  |
| H | 2.047273  | 4.439082  | 2.105757  |
| O | -3.742407 | 4.495734  | -1.197566 |
| H | -3.400705 | 4.004263  | -1.967562 |
| O | -3.725368 | 4.448452  | 1.252718  |
| H | -3.371279 | 3.929360  | 1.998611  |
| O | -6.217185 | -1.050651 | -1.269238 |
| H | -5.609386 | -0.935605 | -2.023661 |
| O | -6.241659 | -1.073062 | 1.193179  |
| H | -5.655652 | -0.970796 | 1.966351  |
| O | -2.189259 | -5.357718 | -1.172623 |
| H | -1.991501 | -4.933275 | -2.028237 |
| O | -2.259753 | -5.422398 | 1.178125  |
| H | -2.121967 | -5.039141 | 2.063665  |
| O | 3.161806  | -1.417873 | 0.058399  |
| O | 4.503310  | 0.377263  | -0.032421 |
| O | -3.080795 | 2.070861  | -0.003532 |
| O | -4.054746 | 0.019660  | -0.030678 |
| O | 1.079233  | -3.011162 | 0.160258  |
| H | 0.789155  | -3.047699 | 1.092673  |
| H | 1.825201  | -2.326715 | 0.146656  |
| C | 3.342130  | -0.155724 | 0.014611  |
| C | 2.145010  | 0.792168  | 0.004624  |
| H | 2.244624  | 1.414268  | -0.903290 |
| H | 2.278533  | 1.483542  | 0.855980  |
| C | 0.794659  | 0.089526  | 0.054968  |
| H | 0.740555  | -0.506503 | 0.981995  |
| H | 0.739384  | -0.639471 | -0.769218 |
| C | -0.442221 | 0.988178  | -0.009682 |
| H | -0.468268 | 1.690832  | 0.840898  |
| H | -0.430090 | 1.608912  | -0.922464 |
| C | -1.687921 | 0.101080  | 0.002641  |
| H | -1.684523 | -0.550694 | 0.894563  |
| H | -1.674463 | -0.594026 | -0.854689 |
| C | -3.040550 | 0.798525  | -0.014407 |

(Pimelate)<sup>2-</sup>@[Mo<sub>12</sub>O<sub>12</sub>S<sub>12</sub>(OH)<sub>12</sub>] (C<sub>2</sub> symmetry)

81 atoms; Bond energy: -535.697 eV

|    |           |           |           |
|----|-----------|-----------|-----------|
| Mo | 6.873261  | 0.089844  | 0.060754  |
| Mo | 0.258710  | 5.174629  | -0.018564 |
| Mo | -0.258710 | -5.174629 | -0.018564 |
| Mo | 3.090194  | 4.882904  | 0.011205  |
| Mo | -3.090194 | -4.882904 | 0.011205  |
| Mo | 5.805099  | 2.712966  | 0.047732  |
| Mo | -5.805099 | -2.712966 | 0.047732  |
| Mo | -6.873261 | -0.089844 | 0.060754  |
| Mo | 5.554700  | -3.003591 | 0.021010  |
| Mo | -5.554700 | 3.003591  | 0.021010  |
| Mo | 3.109724  | -4.457656 | -0.013617 |
| Mo | -3.109724 | 4.457656  | -0.013617 |
| S  | 1.599188  | 4.621668  | 1.814209  |
| S  | 6.224174  | 1.368362  | 1.933731  |
| S  | 4.099273  | -3.427333 | 1.832239  |
| S  | 1.637692  | 4.636657  | -1.829034 |
| S  | 6.281558  | 1.370989  | -1.826769 |
| S  | 4.142609  | -3.416199 | -1.832145 |
| S  | -1.599188 | -4.621668 | 1.814209  |
| S  | -6.224174 | -1.368362 | 1.933731  |
| S  | -4.099273 | 3.427333  | 1.832239  |
| S  | -1.637692 | -4.636657 | -1.829034 |
| S  | -6.281558 | -1.370989 | -1.826769 |
| S  | -4.142609 | 3.416199  | -1.832145 |
| O  | 0.068356  | 6.863787  | -0.012164 |
| O  | 3.591090  | 6.505702  | 0.021946  |
| O  | 7.129845  | 3.794409  | 0.065517  |
| O  | 8.579554  | 0.204201  | 0.085969  |
| O  | 6.630269  | -4.319229 | 0.029191  |
| O  | 3.623441  | -6.079150 | -0.010772 |
| O  | -0.068356 | -6.863787 | -0.012164 |
| O  | -3.591090 | -6.505702 | 0.021946  |
| O  | -7.129845 | -3.794409 | 0.065517  |
| O  | -8.579554 | -0.204201 | 0.085969  |
| O  | -6.630269 | 4.319229  | 0.029191  |
| O  | -3.623441 | 6.079150  | -0.010772 |
| O  | 4.457624  | 3.896345  | 1.254787  |
| H  | 4.067244  | 3.390458  | 1.991079  |
| O  | 6.608284  | -1.670289 | 1.280070  |
| H  | 6.100254  | -1.430616 | 2.077835  |
| O  | -1.323074 | 4.370158  | 1.126399  |
| H  | -1.299121 | 4.252692  | 2.092149  |
| O  | 4.497975  | 3.911299  | -1.197777 |
| H  | 4.136522  | 3.417251  | -1.956108 |
| O  | 6.642385  | -1.655406 | -1.188463 |
| H  | 6.162867  | -1.404785 | -2.000151 |
| O  | -1.328144 | 4.390301  | -1.178485 |
| H  | -1.310234 | 4.297847  | -2.146893 |
| O  | -4.457624 | -3.896345 | 1.254787  |
| H  | -4.067244 | -3.390458 | 1.991079  |
| O  | -6.608284 | 1.670289  | 1.280070  |
| H  | -6.100254 | 1.430616  | 2.077835  |
| O  | 1.323074  | -4.370158 | 1.126399  |
| H  | 1.299121  | -4.252692 | 2.092149  |

Electronic Supplementary Information for Dalton Transactions  
This journal is © The Royal Society of Chemistry 2008

|   |           |           |           |
|---|-----------|-----------|-----------|
| O | -4.497975 | -3.911299 | -1.197777 |
| H | -4.136522 | -3.417251 | -1.956108 |
| O | -6.642385 | 1.655406  | -1.188463 |
| H | -6.162867 | 1.404785  | -2.000151 |
| O | 1.328144  | -4.390301 | -1.178485 |
| H | 1.310234  | -4.297847 | -2.146893 |
| O | 3.708564  | 1.527860  | -0.008458 |
| O | 4.560757  | -0.558896 | 0.036821  |
| O | -3.708564 | -1.527860 | -0.008458 |
| O | -4.560757 | 0.558896  | 0.036821  |
| C | 3.579886  | 0.266816  | -0.049504 |
| C | 2.192262  | -0.329074 | -0.243936 |
| H | 1.909872  | -0.818814 | 0.702257  |
| H | 2.313947  | -1.146965 | -0.972055 |
| C | 1.128866  | 0.664737  | -0.733112 |
| H | 1.631026  | 1.408095  | -1.367393 |
| H | 0.720006  | 1.235019  | 0.115367  |
| C | -3.579886 | -0.266816 | -0.049504 |
| C | -2.192262 | 0.329074  | -0.243936 |
| H | -1.909872 | 0.818814  | 0.702257  |
| H | -2.313947 | 1.146965  | -0.972055 |
| C | -1.128866 | -0.664737 | -0.733112 |
| H | -1.631026 | -1.408095 | -1.367393 |
| H | -0.720006 | -1.235019 | 0.115367  |
| C | 0.000000  | 0.000000  | -1.538131 |
| H | -0.455804 | 0.752325  | -2.203258 |
| H | 0.455804  | -0.752325 | -2.203258 |

(Suberate)<sup>2-</sup>@[Mo<sub>12</sub>O<sub>12</sub>S<sub>12</sub>(OH)<sub>12</sub>] (C<sub>1</sub> symmetry)

84 atoms; Bond energy: -551.8864 eV

|    |           |           |           |
|----|-----------|-----------|-----------|
| Mo | 4.817177  | 1.715143  | -0.015545 |
| Mo | -4.960615 | -1.735746 | -0.006467 |
| Mo | -5.003531 | 1.707672  | -0.023409 |
| Mo | 4.824981  | -1.699507 | -0.022133 |
| Mo | 4.090661  | 4.468177  | -0.004834 |
| Mo | -4.096937 | -4.448386 | 0.000179  |
| Mo | -4.116220 | 4.417458  | -0.015084 |
| Mo | 4.106768  | -4.454659 | -0.024663 |
| Mo | 1.520653  | 6.657974  | 0.000947  |
| Mo | -1.355864 | -6.539514 | 0.019382  |
| Mo | -1.310462 | 6.462780  | 0.021450  |
| Mo | 1.481392  | -6.625740 | 0.008682  |
| O  | 6.514473  | 1.794775  | -0.075438 |
| O  | -6.652268 | -1.903788 | -0.013451 |
| O  | 6.523486  | -1.772515 | -0.002141 |
| O  | -6.694862 | 1.852101  | -0.116346 |
| O  | 5.655776  | 5.126290  | -0.066233 |
| O  | -5.599842 | -5.238303 | 0.022756  |
| O  | 5.661816  | -5.135935 | 0.011665  |
| O  | -5.585237 | 5.265665  | -0.104339 |
| O  | 1.946954  | 8.314267  | -0.043256 |
| O  | -1.929756 | -8.149351 | 0.092504  |
| O  | 1.967191  | -8.264884 | 0.071648  |
| O  | -1.935450 | 8.054570  | -0.005173 |
| O  | 4.310348  | 0.010234  | 1.139504  |

Electronic Supplementary Information for Dalton Transactions  
This journal is © The Royal Society of Chemistry 2008

|   |           |           |           |
|---|-----------|-----------|-----------|
| H | 4.284900  | 0.009027  | 2.112126  |
| O | 4.275085  | 0.000311  | -1.162319 |
| H | 4.234909  | 0.000611  | -2.134667 |
| O | -4.577783 | 0.003415  | 1.157219  |
| H | -4.501942 | 0.014948  | 2.127018  |
| O | -4.492811 | -0.018375 | -1.148845 |
| H | -4.343951 | -0.021887 | -2.110427 |
| O | 3.077580  | 5.846017  | -1.244928 |
| H | 2.676880  | 5.425070  | -2.023342 |
| O | 3.137348  | 5.902497  | 1.230210  |
| H | 2.766651  | 5.513938  | 2.040354  |
| O | -2.943612 | -5.716949 | -1.217387 |
| H | -2.564120 | -5.271167 | -1.997151 |
| O | -2.880316 | -5.616729 | 1.238437  |
| H | -2.493016 | -5.139693 | 1.995686  |
| O | 3.084534  | -5.853193 | -1.236749 |
| H | 2.703689  | -5.449475 | -2.038523 |
| O | 3.025429  | -5.753151 | 1.224716  |
| H | 2.633946  | -5.311169 | 2.000857  |
| O | -2.809563 | 5.527765  | -1.213125 |
| H | -2.419973 | 5.046681  | -1.966088 |
| O | -2.894190 | 5.581626  | 1.232579  |
| H | -2.538873 | 5.104196  | 2.004576  |
| S | 0.118432  | 6.524054  | 1.896915  |
| S | 0.093412  | 6.428731  | -1.860399 |
| S | 0.072579  | -6.415490 | 1.883169  |
| S | 0.052735  | -6.589540 | -1.872326 |
| S | 4.147869  | 2.982403  | 1.835359  |
| S | 4.005913  | 2.956461  | -1.817104 |
| S | -4.144436 | -2.940321 | 1.816779  |
| S | -4.149821 | -2.960830 | -1.827657 |
| S | 4.056301  | -2.948726 | 1.790922  |
| S | 4.115483  | -2.966738 | -1.858764 |
| S | -4.315332 | 2.960178  | 1.826635  |
| S | -4.107685 | 2.900844  | -1.816670 |
| O | 1.409245  | 4.272852  | 0.089524  |
| O | -0.991746 | -4.177011 | -0.161000 |
| O | 1.263893  | -4.250611 | -0.181353 |
| O | -0.837616 | 4.103142  | 0.180852  |
| C | 0.327851  | 3.610754  | 0.290287  |
| C | 0.150490  | -3.653232 | -0.375791 |
| C | -0.522586 | 0.191675  | 2.020996  |
| H | -1.487808 | -0.207680 | 2.374517  |
| H | 0.085313  | 0.375749  | 2.923285  |
| C | 0.484274  | 2.161451  | 0.719786  |
| H | 0.846674  | 1.600519  | -0.157823 |
| H | 1.315779  | 2.137863  | 1.442636  |
| C | -0.557228 | -1.204603 | -0.137245 |
| H | -0.675662 | -0.295170 | -0.746739 |
| H | -1.571759 | -1.571359 | 0.086881  |
| C | 0.177497  | -2.256032 | -0.974459 |
| H | 1.222675  | -1.964635 | -1.143622 |
| H | -0.308683 | -2.346243 | -1.959241 |
| C | 0.177353  | -0.873428 | 1.166045  |
| H | 1.200916  | -0.539189 | 0.925452  |
| H | 0.296447  | -1.794078 | 1.760832  |
| C | -0.777134 | 1.528744  | 1.308769  |
| H | -1.232849 | 2.233331  | 2.019240  |
| H | -1.525059 | 1.399739  | 0.512327  |



**(Muconate)<sup>2-</sup>@[Mo<sub>12</sub>O<sub>12</sub>S<sub>12</sub>(OH)<sub>12</sub>] (C<sub>s</sub> symmetry, Figure 7c)**

74 atoms; Bond energy: -503.7826 eV

|    |           |           |           |
|----|-----------|-----------|-----------|
| Mo | 6.393827  | 0.259888  | 0.000000  |
| Mo | 5.325616  | 3.528660  | 0.000000  |
| Mo | 3.039547  | 5.220673  | 0.000000  |
| Mo | -0.415321 | 5.869498  | 0.000000  |
| Mo | -3.138687 | 5.023590  | 0.000000  |
| Mo | -5.468068 | 2.418905  | 0.000000  |
| Mo | -6.393827 | -0.259888 | 0.000000  |
| Mo | -5.325616 | -3.528660 | 0.000000  |
| Mo | -3.039547 | -5.220673 | 0.000000  |
| Mo | 0.415321  | -5.869498 | 0.000000  |
| Mo | 3.138687  | -5.023590 | 0.000000  |
| Mo | 5.468068  | -2.418905 | 0.000000  |
| O  | 8.105573  | 0.226684  | 0.000000  |
| O  | 6.539407  | 4.715659  | 0.000000  |
| O  | 3.752905  | 6.763707  | 0.000000  |
| O  | -0.536088 | 7.564884  | 0.000000  |
| O  | -3.969199 | 6.504802  | 0.000000  |
| O  | -6.866565 | 3.399363  | 0.000000  |
| O  | -8.105573 | -0.226684 | 0.000000  |
| O  | -6.539407 | -4.715659 | 0.000000  |
| O  | -3.752905 | -6.763707 | 0.000000  |
| O  | 0.536088  | -7.564884 | 0.000000  |
| O  | 3.969199  | -6.504802 | 0.000000  |
| O  | 6.866565  | -3.399363 | 0.000000  |
| O  | 6.131722  | 2.031768  | -1.227835 |
| H  | 5.586783  | 1.825017  | -2.010674 |
| O  | 1.277907  | 5.384177  | -1.174130 |
| H  | 1.201359  | 4.999576  | -2.066383 |
| O  | -4.266711 | 3.758050  | -1.221034 |
| H  | -3.810216 | 3.340930  | -1.974431 |
| O  | -6.131722 | -2.031768 | -1.227835 |
| H  | -5.586783 | -1.825017 | -2.010674 |
| O  | -1.277907 | -5.384177 | -1.174130 |
| H  | -1.201359 | -4.999576 | -2.066383 |
| O  | 4.266711  | -3.758050 | -1.221034 |
| H  | 3.810216  | -3.340930 | -1.974431 |
| O  | 6.131722  | 2.031768  | 1.227835  |
| H  | 5.586783  | 1.825017  | 2.010674  |
| O  | 1.277907  | 5.384177  | 1.174130  |
| H  | 1.201359  | 4.999576  | 2.066383  |
| O  | -4.266711 | 3.758050  | 1.221034  |
| H  | -3.810216 | 3.340930  | 1.974431  |
| O  | -6.131722 | -2.031768 | 1.227835  |
| H  | -5.586783 | -1.825017 | 2.010674  |
| O  | -1.277907 | -5.384177 | 1.174130  |
| H  | -1.201359 | -4.999576 | 2.066383  |
| O  | 4.266711  | -3.758050 | 1.221034  |
| H  | 3.810216  | -3.340930 | 1.974431  |
| S  | 5.845144  | -1.053578 | -1.879107 |
| S  | 3.916554  | 4.049634  | -1.818308 |
| S  | -1.646999 | 5.078117  | -1.819403 |
| S  | -5.845144 | 1.053578  | -1.879107 |
| S  | -3.916554 | -4.049634 | -1.818308 |
| S  | 1.646999  | -5.078117 | -1.819403 |

|   |           |           |          |
|---|-----------|-----------|----------|
| S | 5.845144  | -1.053578 | 1.879107 |
| S | 3.916554  | 4.049634  | 1.818308 |
| S | -1.646999 | 5.078117  | 1.819403 |
| S | -5.845144 | 1.053578  | 1.879107 |
| S | -3.916554 | -4.049634 | 1.818308 |
| S | 1.646999  | -5.078117 | 1.819403 |
| C | 3.162777  | -0.109397 | 0.000000 |
| C | -3.162777 | 0.109397  | 0.000000 |
| C | -1.790347 | -0.457119 | 0.000000 |
| C | 1.790347  | 0.457119  | 0.000000 |
| C | 0.661637  | -0.286288 | 0.000000 |
| C | -0.661637 | 0.286288  | 0.000000 |
| H | -1.737827 | -1.549434 | 0.000000 |
| H | 1.737827  | 1.549434  | 0.000000 |
| H | -0.758979 | 1.377188  | 0.000000 |
| H | 0.758979  | -1.377188 | 0.000000 |
| O | 4.106154  | 0.763183  | 0.000000 |
| O | 3.323508  | -1.375434 | 0.000000 |
| O | -3.323508 | 1.375434  | 0.000000 |
| O | -4.106154 | -0.763183 | 0.000000 |

**(Muconate, H<sub>2</sub>O)<sup>2-</sup>@ [Mo<sub>12</sub>O<sub>12</sub>S<sub>12</sub>(OH)<sub>12</sub>] (C<sub>1</sub> symmetry, no constraint, Figure 7d)**

77 atoms; Bond energy: -517.9760 eV

|    |           |           |           |
|----|-----------|-----------|-----------|
| Mo | 4.493207  | 3.869697  | -0.003429 |
| Mo | 6.116028  | 1.551753  | -0.035328 |
| Mo | 6.460069  | -1.930592 | -0.028970 |
| Mo | 4.629118  | -4.123771 | -0.016105 |
| Mo | 1.401554  | -5.526512 | 0.012296  |
| Mo | -1.441215 | -5.337707 | 0.020830  |
| Mo | -4.530142 | -3.708529 | 0.007250  |
| Mo | -6.457397 | -1.626624 | -0.039845 |
| Mo | -6.320959 | 1.742167  | -0.027066 |
| Mo | -4.499269 | 3.930835  | 0.000779  |
| Mo | -1.358442 | 5.470122  | 0.016766  |
| Mo | 1.486690  | 5.624265  | 0.021704  |
| S  | 5.111975  | 2.597225  | -1.885001 |
| S  | 5.246479  | 2.637224  | 1.859411  |
| S  | 5.468917  | -2.977263 | -1.897163 |
| S  | 5.366981  | -2.870145 | 1.823488  |
| S  | 0.011079  | -5.045855 | -1.815437 |
| S  | 0.027603  | -4.905675 | 1.807522  |
| S  | -5.387782 | -2.616319 | -1.893451 |
| S  | -5.453486 | -2.587473 | 1.862687  |
| S  | -5.101254 | 2.632753  | -1.844196 |
| S  | -5.114861 | 2.601056  | 1.812688  |
| S  | 0.078360  | 5.167053  | -1.809080 |
| S  | 0.068564  | 5.118472  | 1.832881  |
| O  | 5.595539  | 5.175252  | -0.039400 |
| O  | 7.712553  | 2.142448  | -0.098092 |
| O  | 8.056536  | -2.513876 | 0.010237  |
| O  | 5.599854  | -5.520653 | 0.040020  |
| O  | 1.600639  | -7.212193 | 0.078186  |
| O  | -1.838862 | -6.986852 | 0.076769  |
| O  | -5.425774 | -5.163400 | 0.022578  |
| O  | -8.009703 | -2.342396 | -0.075597 |
| O  | -7.777151 | 2.616497  | -0.018446 |

|   |           |           |           |
|---|-----------|-----------|-----------|
| O | -5.526266 | 5.286569  | -0.005892 |
| O | -1.817785 | 7.106110  | 0.019691  |
| O | 1.735606  | 7.303866  | 0.034633  |
| O | 2.980607  | 4.839252  | -1.210177 |
| H | 2.676248  | 4.322288  | -1.978605 |
| O | 3.016509  | 4.867831  | 1.244135  |
| H | 2.711338  | 4.310743  | 1.984345  |
| O | 6.374270  | -0.214170 | -1.231626 |
| H | 5.849896  | -0.289733 | -2.050816 |
| O | 6.441666  | -0.190855 | 1.166574  |
| H | 5.885901  | -0.248137 | 1.966695  |
| O | 2.981315  | -4.810857 | -1.196272 |
| H | 2.902205  | -4.690560 | -2.159255 |
| O | 2.978697  | -4.751770 | 1.190198  |
| H | 2.743127  | -4.182707 | 1.945951  |
| O | -2.891666 | -4.468051 | -1.204755 |
| H | -2.617651 | -3.944463 | -1.978975 |
| O | -2.895955 | -4.436968 | 1.237211  |
| H | -2.602537 | -3.846494 | 1.954335  |
| O | -6.837804 | 0.114502  | -1.272994 |
| H | -6.280492 | 0.067112  | -2.073279 |
| O | -6.862695 | 0.106116  | 1.191519  |
| H | -6.329722 | 0.047593  | 2.007696  |
| O | -2.757872 | 4.386199  | -1.133037 |
| H | -2.660903 | 4.193808  | -2.083609 |
| O | -2.821142 | 4.490410  | 1.188873  |
| H | -2.668330 | 4.165788  | 2.094477  |
| O | 2.997618  | -2.164955 | -0.143522 |
| H | 3.352175  | -1.219122 | -0.026413 |
| H | 2.727516  | -2.191332 | -1.081101 |
| O | 2.657134  | 2.402167  | 0.108455  |
| O | 3.767599  | 0.410460  | 0.109642  |
| O | -4.536068 | -0.215502 | -0.043312 |
| O | -3.002978 | -1.883412 | 0.045001  |
| C | 2.698256  | 1.132216  | 0.184599  |
| C | 1.422032  | 0.392561  | 0.362442  |
| H | 1.512347  | -0.666557 | 0.614048  |
| C | 0.184250  | 0.896980  | 0.150280  |
| H | 0.057157  | 1.951026  | -0.118403 |
| C | -0.960800 | 0.022460  | 0.211012  |
| H | -0.765913 | -1.032224 | 0.436149  |
| C | -2.245180 | 0.366170  | -0.028696 |
| H | -2.536935 | 1.394087  | -0.258434 |
| C | -3.326621 | -0.653505 | -0.002630 |

(Muconate, 2H<sub>2</sub>O)<sup>2-</sup>@[Mo<sub>12</sub>O<sub>12</sub>S<sub>12</sub>(OH)<sub>12</sub>] (C<sub>i</sub> symmetry, figure 7e)

80 atoms; Bond energy: -532.0904 eV

|    |           |           |           |
|----|-----------|-----------|-----------|
| Mo | 6.369038  | 0.266122  | -0.038034 |
| Mo | 5.288949  | 3.552088  | 0.019679  |
| Mo | 3.018186  | 5.286886  | 0.017389  |
| Mo | -0.415029 | 6.140082  | -0.016598 |
| Mo | -3.095920 | 5.105109  | -0.044245 |
| Mo | -5.477461 | 2.455917  | 0.022010  |
| Mo | -6.369038 | -0.266122 | 0.038034  |
| Mo | -5.288949 | -3.552088 | -0.019679 |
| Mo | -3.018186 | -5.286886 | -0.017389 |
| Mo | 0.415029  | -6.140082 | 0.016598  |
| Mo | 3.095920  | -5.105109 | 0.044245  |

Electronic Supplementary Information for Dalton Transactions  
This journal is © The Royal Society of Chemistry 2008

|    |           |           |           |
|----|-----------|-----------|-----------|
| Mo | 5.477461  | -2.455917 | -0.022010 |
| O  | 8.077825  | 0.233057  | -0.082648 |
| O  | 6.507016  | 4.732401  | 0.080422  |
| O  | 3.775961  | 6.806072  | 0.089236  |
| O  | -0.435173 | 7.839148  | 0.039691  |
| O  | -4.067549 | 6.503085  | -0.006326 |
| O  | -6.911419 | 3.375164  | 0.076012  |
| O  | -8.077825 | -0.233057 | 0.082648  |
| O  | -6.507016 | -4.732401 | -0.080422 |
| O  | -3.775961 | -6.806072 | -0.089236 |
| O  | 0.435173  | -7.839148 | -0.039691 |
| O  | 4.067549  | -6.503085 | 0.006326  |
| O  | 6.911419  | -3.375164 | -0.076012 |
| O  | 6.100136  | 2.069615  | -1.229316 |
| H  | 5.576170  | 1.895220  | -2.033804 |
| O  | 1.282077  | 5.556424  | -1.171955 |
| H  | 1.214968  | 5.310597  | -2.112455 |
| O  | -4.310908 | 3.809624  | -1.211488 |
| H  | -4.098113 | 3.587664  | -2.134911 |
| O  | -6.124957 | -2.028659 | -1.215607 |
| H  | -5.603460 | -1.817595 | -2.012584 |
| O  | -1.239781 | -5.483315 | -1.145992 |
| H  | -1.108698 | -5.106452 | -2.035121 |
| O  | 4.176080  | -3.746141 | -1.161545 |
| H  | 3.797078  | -3.434419 | -2.002878 |
| O  | 6.124957  | 2.028659  | 1.215607  |
| H  | 5.603460  | 1.817595  | 2.012584  |
| O  | 1.239781  | 5.483315  | 1.145992  |
| H  | 1.108698  | 5.106452  | 2.035121  |
| O  | -4.176080 | 3.746141  | 1.161545  |
| H  | -3.797078 | 3.434419  | 2.002878  |
| O  | -6.100136 | -2.069615 | 1.229316  |
| H  | -5.576170 | -1.895220 | 2.033804  |
| O  | -1.282077 | -5.556424 | 1.171955  |
| H  | -1.214968 | -5.310597 | 2.112455  |
| O  | 4.310908  | -3.809624 | 1.211488  |
| H  | 4.098113  | -3.587664 | 2.134911  |
| S  | 5.761067  | -1.051935 | -1.899343 |
| S  | 3.930334  | 4.158463  | -1.812939 |
| S  | -1.684972 | 5.587389  | -1.915405 |
| S  | -5.860247 | 1.063112  | -1.840460 |
| S  | -3.830096 | -4.023339 | -1.812313 |
| S  | 1.681657  | -5.452328 | -1.818047 |
| S  | 5.860247  | -1.063112 | 1.840460  |
| S  | 3.830096  | 4.023339  | 1.812313  |
| S  | -1.681657 | 5.452328  | 1.818047  |
| S  | -5.761067 | 1.051935  | 1.899343  |
| S  | -3.930334 | -4.158463 | 1.812939  |
| S  | 1.684972  | -5.587389 | 1.915405  |
| C  | 3.141917  | -0.016849 | 0.065561  |
| C  | -3.141917 | 0.016849  | -0.065561 |
| C  | -1.763369 | -0.500978 | -0.191234 |
| C  | 1.763369  | 0.500978  | 0.191234  |
| C  | 0.668627  | -0.247097 | -0.077472 |
| C  | -0.668627 | 0.247097  | 0.077472  |
| H  | -1.674294 | -1.545176 | -0.505148 |
| H  | 1.674294  | 1.545176  | 0.505148  |
| H  | -0.779002 | 1.275348  | 0.425384  |
| H  | 0.779002  | -1.275348 | -0.425384 |
| O  | 4.081197  | 0.838812  | 0.025771  |
| O  | 3.331986  | -1.288950 | 0.021589  |

Electronic Supplementary Information for Dalton Transactions  
This journal is © The Royal Society of Chemistry 2008

|   |           |           |           |
|---|-----------|-----------|-----------|
| O | -3.331986 | 1.288950  | -0.021589 |
| O | -4.081197 | -0.838812 | -0.025771 |
| O | 1.622088  | -3.137161 | 0.272589  |
| H | 1.385651  | -3.226326 | 1.217087  |
| H | 2.266080  | -2.339847 | 0.214331  |
| O | -1.622088 | 3.137161  | -0.272589 |
| H | -1.385651 | 3.226326  | -1.217087 |
| H | -2.266080 | 2.339847  | -0.214331 |

(Terephthalate)<sup>2-</sup>@[Mo<sub>12</sub>O<sub>12</sub>S<sub>12</sub>(OH)<sub>12</sub>] (Planar conformation; D<sub>2h</sub> symmetry, Figure 7f)

76 atoms; Bond energy: -522.2069 eV

|    |           |           |           |
|----|-----------|-----------|-----------|
| Mo | 5.860659  | 1.411031  | 0.000000  |
| Mo | 4.246612  | 4.486844  | 0.000000  |
| Mo | 1.754005  | 5.860540  | 0.000000  |
| Mo | -1.754005 | 5.860540  | 0.000000  |
| Mo | -4.246612 | 4.486844  | 0.000000  |
| Mo | -5.860659 | 1.411031  | 0.000000  |
| Mo | -5.860659 | -1.411031 | 0.000000  |
| Mo | -4.246612 | -4.486844 | 0.000000  |
| Mo | -1.754005 | -5.860540 | 0.000000  |
| Mo | 1.754005  | -5.860540 | 0.000000  |
| Mo | 4.246612  | -4.486844 | 0.000000  |
| Mo | 5.860659  | -1.411031 | 0.000000  |
| O  | 7.501605  | 1.897782  | 0.000000  |
| O  | 5.345275  | 5.781906  | 0.000000  |
| O  | 2.220474  | 7.495445  | 0.000000  |
| O  | -2.220474 | 7.495445  | 0.000000  |
| O  | -5.345275 | 5.781906  | 0.000000  |
| O  | -7.501605 | 1.897782  | 0.000000  |
| O  | -7.501605 | -1.897782 | 0.000000  |
| O  | -5.345275 | -5.781906 | 0.000000  |
| O  | -2.220474 | -7.495445 | 0.000000  |
| O  | 2.220474  | -7.495445 | 0.000000  |
| O  | 5.345275  | -5.781906 | 0.000000  |
| O  | 7.501605  | -1.897782 | 0.000000  |
| O  | 5.122411  | 3.040139  | -1.227226 |
| H  | 4.577094  | 2.736449  | -1.975840 |
| O  | 0.000000  | 5.734054  | -1.179294 |
| H  | 0.000000  | 5.298542  | -2.050741 |
| O  | -5.122411 | 3.040139  | -1.227226 |
| H  | -4.577094 | 2.736449  | -1.975840 |
| O  | -5.122411 | -3.040139 | -1.227226 |
| H  | -4.577094 | -2.736449 | -1.975840 |
| O  | 0.000000  | -5.734054 | -1.179294 |
| H  | 0.000000  | -5.298542 | -2.050741 |
| O  | 5.122411  | -3.040139 | -1.227226 |
| H  | 4.577094  | -2.736449 | -1.975840 |
| O  | 5.122411  | 3.040139  | 1.227226  |
| H  | 4.577094  | 2.736449  | 1.975840  |
| O  | 0.000000  | 5.734054  | 1.179294  |
| H  | 0.000000  | 5.298542  | 2.050741  |
| O  | -5.122411 | 3.040139  | 1.227226  |
| H  | -4.577094 | 2.736449  | 1.975840  |
| O  | -5.122411 | -3.040139 | 1.227226  |
| H  | -4.577094 | -2.736449 | 1.975840  |
| O  | 0.000000  | -5.734054 | 1.179294  |
| H  | 0.000000  | -5.298542 | 2.050741  |

|   |           |           |           |
|---|-----------|-----------|-----------|
| O | 5.122411  | -3.040139 | 1.227226  |
| H | 4.577094  | -2.736449 | 1.975840  |
| S | 5.757326  | 0.000000  | -1.881604 |
| S | 2.789636  | 4.825299  | -1.820324 |
| S | -2.789636 | 4.825299  | -1.820324 |
| S | -5.757326 | 0.000000  | -1.881604 |
| S | -2.789636 | -4.825299 | -1.820324 |
| S | 2.789636  | -4.825299 | -1.820324 |
| S | 5.757326  | 0.000000  | 1.881604  |
| S | 2.789636  | 4.825299  | 1.820324  |
| S | -2.789636 | 4.825299  | 1.820324  |
| S | -5.757326 | 0.000000  | 1.881604  |
| S | -2.789636 | -4.825299 | 1.820324  |
| S | 2.789636  | -4.825299 | 1.820324  |
| C | 1.407948  | 0.000000  | 0.000000  |
| C | -1.407948 | 0.000000  | 0.000000  |
| C | 0.696157  | 1.208599  | 0.000000  |
| C | 0.696157  | -1.208599 | 0.000000  |
| C | -0.696157 | 1.208599  | 0.000000  |
| C | -0.696157 | -1.208599 | 0.000000  |
| H | 1.258786  | 2.140433  | 0.000000  |
| H | 1.258786  | -2.140433 | 0.000000  |
| H | -1.258786 | 2.140433  | 0.000000  |
| H | -1.258786 | -2.140433 | 0.000000  |
| C | 2.914487  | 0.000000  | 0.000000  |
| C | -2.914487 | 0.000000  | 0.000000  |
| O | 3.500160  | 1.135132  | 0.000000  |
| O | 3.500160  | -1.135132 | 0.000000  |
| O | -3.500160 | 1.135132  | 0.000000  |
| O | -3.500160 | -1.135132 | 0.000000  |

(Terephthalate)<sup>2-</sup>@[Mo<sub>12</sub>O<sub>12</sub>S<sub>12</sub>(OH)<sub>12</sub>] (Perpendicular conformation; D<sub>2h</sub> symmetry, Figure 7g)

76 atoms; Bond energy: -521.7970 eV

|    |           |           |          |
|----|-----------|-----------|----------|
| Mo | 5.863605  | 1.413948  | 0.000000 |
| Mo | 4.240942  | 4.487625  | 0.000000 |
| Mo | 1.750326  | 5.863197  | 0.000000 |
| Mo | -1.750326 | 5.863197  | 0.000000 |
| Mo | -4.240942 | 4.487625  | 0.000000 |
| Mo | -5.863605 | 1.413948  | 0.000000 |
| Mo | -5.863605 | -1.413948 | 0.000000 |
| Mo | -4.240942 | -4.487625 | 0.000000 |
| Mo | -1.750326 | -5.863197 | 0.000000 |
| Mo | 1.750326  | -5.863197 | 0.000000 |
| Mo | 4.240942  | -4.487625 | 0.000000 |
| Mo | 5.863605  | -1.413948 | 0.000000 |
| O  | 7.504002  | 1.899601  | 0.000000 |
| O  | 5.347228  | 5.776978  | 0.000000 |
| O  | 2.212700  | 7.499720  | 0.000000 |
| O  | -2.212700 | 7.499720  | 0.000000 |
| O  | -5.347228 | 5.776978  | 0.000000 |
| O  | -7.504002 | 1.899601  | 0.000000 |
| O  | -7.504002 | -1.899601 | 0.000000 |
| O  | -5.347228 | -5.776978 | 0.000000 |
| O  | -2.212700 | -7.499720 | 0.000000 |
| O  | 2.212700  | -7.499720 | 0.000000 |

|   |           |           |           |
|---|-----------|-----------|-----------|
| O | 5.347228  | -5.776978 | 0.000000  |
| O | 7.504002  | -1.899601 | 0.000000  |
| O | 5.117976  | 3.035458  | -1.226383 |
| H | 4.569957  | 2.733325  | -1.973407 |
| O | 0.000000  | 5.748910  | -1.185156 |
| H | 0.000000  | 5.270527  | -2.033535 |
| O | -5.117976 | 3.035458  | -1.226383 |
| H | -4.569957 | 2.733325  | -1.973407 |
| O | -5.117976 | -3.035458 | -1.226383 |
| H | -4.569957 | -2.733325 | -1.973407 |
| O | 0.000000  | -5.748910 | -1.185156 |
| H | 0.000000  | -5.270527 | -2.033535 |
| O | 5.117976  | -3.035458 | -1.226383 |
| H | 4.569957  | -2.733325 | -1.973407 |
| O | 5.117976  | 3.035458  | 1.226383  |
| H | 4.569957  | 2.733325  | 1.973407  |
| O | 0.000000  | 5.748910  | 1.185156  |
| H | 0.000000  | 5.270527  | 2.033535  |
| O | -5.117976 | 3.035458  | 1.226383  |
| H | -4.569957 | 2.733325  | 1.973407  |
| O | -5.117976 | -3.035458 | 1.226383  |
| H | -4.569957 | -2.733325 | 1.973407  |
| O | 0.000000  | -5.748910 | 1.185156  |
| H | 0.000000  | -5.270527 | 2.033535  |
| O | 5.117976  | -3.035458 | 1.226383  |
| H | 4.569957  | -2.733325 | 1.973407  |
| S | 5.754612  | 0.000000  | -1.881229 |
| S | 2.793196  | 4.839166  | -1.823164 |
| S | -2.793196 | 4.839166  | -1.823164 |
| S | -5.754612 | 0.000000  | -1.881229 |
| S | -2.793196 | -4.839166 | -1.823164 |
| S | 2.793196  | -4.839166 | -1.823164 |
| S | 5.754612  | 0.000000  | 1.881229  |
| S | 2.793196  | 4.839166  | 1.823164  |
| S | -2.793196 | 4.839166  | 1.823164  |
| S | -5.754612 | 0.000000  | 1.881229  |
| S | -2.793196 | -4.839166 | 1.823164  |
| S | 2.793196  | -4.839166 | 1.823164  |
| C | 1.407404  | 0.000000  | 0.000000  |
| C | -1.407404 | 0.000000  | 0.000000  |
| C | 0.697792  | 0.000000  | 1.206758  |
| C | 0.697792  | 0.000000  | -1.206758 |
| C | -0.697792 | 0.000000  | 1.206758  |
| C | -0.697792 | 0.000000  | -1.206758 |
| H | 1.242596  | 0.000000  | 2.152400  |
| H | 1.242596  | 0.000000  | -2.152400 |
| H | -1.242596 | 0.000000  | 2.152400  |
| H | -1.242596 | 0.000000  | -2.152400 |
| C | 2.917760  | 0.000000  | 0.000000  |
| C | -2.917760 | 0.000000  | 0.000000  |
| O | 3.493709  | 1.135285  | 0.000000  |
| O | 3.493709  | -1.135285 | 0.000000  |
| O | -3.493709 | 1.135285  | 0.000000  |
| O | -3.493709 | -1.135285 | 0.000000  |

(TMT)<sup>2-</sup>@[Mo<sub>12</sub>O<sub>12</sub>S<sub>12</sub>(OH)<sub>12</sub>] (Perpendicular conformation; D<sub>2h</sub> symmetry, Figure 7h) TMT = Tetramethylterephthalate

88 atoms; Bond energy: -586.9353 eV

Electronic Supplementary Information for Dalton Transactions  
This journal is © The Royal Society of Chemistry 2008

|    |           |           |           |
|----|-----------|-----------|-----------|
| Mo | 5.860651  | 1.414890  | 0.000000  |
| Mo | 4.241838  | 4.494311  | 0.000000  |
| Mo | 1.754260  | 5.874083  | 0.000000  |
| Mo | -1.754260 | 5.874083  | 0.000000  |
| Mo | -4.241838 | 4.494311  | 0.000000  |
| Mo | -5.860651 | 1.414890  | 0.000000  |
| Mo | -5.860651 | -1.414890 | 0.000000  |
| Mo | -4.241838 | -4.494311 | 0.000000  |
| Mo | -1.754260 | -5.874083 | 0.000000  |
| Mo | 1.754260  | -5.874083 | 0.000000  |
| Mo | 4.241838  | -4.494311 | 0.000000  |
| Mo | 5.860651  | -1.414890 | 0.000000  |
| O  | 7.499436  | 1.906468  | 0.000000  |
| O  | 5.347381  | 5.783881  | 0.000000  |
| O  | 2.221760  | 7.508693  | 0.000000  |
| O  | -2.221760 | 7.508693  | 0.000000  |
| O  | -5.347381 | 5.783881  | 0.000000  |
| O  | -7.499436 | 1.906468  | 0.000000  |
| O  | -7.499436 | -1.906468 | 0.000000  |
| O  | -5.347381 | -5.783881 | 0.000000  |
| O  | -2.221760 | -7.508693 | 0.000000  |
| O  | 2.221760  | -7.508693 | 0.000000  |
| O  | 5.347381  | -5.783881 | 0.000000  |
| O  | 7.499436  | -1.906468 | 0.000000  |
| O  | 5.115859  | 3.040209  | -1.224711 |
| H  | 4.566734  | 2.735697  | -1.970731 |
| O  | 0.000000  | 5.756728  | -1.180541 |
| H  | 0.000000  | 5.281824  | -2.032034 |
| O  | -5.115859 | 3.040209  | -1.224711 |
| H  | -4.566734 | 2.735697  | -1.970731 |
| O  | -5.115859 | -3.040209 | -1.224711 |
| H  | -4.566734 | -2.735697 | -1.970731 |
| O  | 0.000000  | -5.756728 | -1.180541 |
| H  | 0.000000  | -5.281824 | -2.032034 |
| O  | 5.115859  | -3.040209 | -1.224711 |
| H  | 4.566734  | -2.735697 | -1.970731 |
| O  | 5.115859  | 3.040209  | 1.224711  |
| H  | 4.566734  | 2.735697  | 1.970731  |
| O  | 0.000000  | 5.756728  | 1.180541  |
| H  | 0.000000  | 5.281824  | 2.032034  |
| O  | -5.115859 | 3.040209  | 1.224711  |
| H  | -4.566734 | 2.735697  | 1.970731  |
| O  | -5.115859 | -3.040209 | 1.224711  |
| H  | -4.566734 | -2.735697 | 1.970731  |
| O  | 0.000000  | -5.756728 | 1.180541  |
| H  | 0.000000  | -5.281824 | 2.032034  |
| O  | 5.115859  | -3.040209 | 1.224711  |
| H  | 4.566734  | -2.735697 | 1.970731  |
| S  | 5.762371  | 0.000000  | -1.883369 |
| S  | 2.796020  | 4.851535  | -1.820628 |
| S  | -2.796020 | 4.851535  | -1.820628 |
| S  | -5.762371 | 0.000000  | -1.883369 |
| S  | -2.796020 | -4.851535 | -1.820628 |
| S  | 2.796020  | -4.851535 | -1.820628 |
| S  | 5.762371  | 0.000000  | 1.883369  |
| S  | 2.796020  | 4.851535  | 1.820628  |
| S  | -2.796020 | 4.851535  | 1.820628  |
| S  | -5.762371 | 0.000000  | 1.883369  |
| S  | -2.796020 | -4.851535 | 1.820628  |
| S  | 2.796020  | -4.851535 | 1.820628  |



|   |           |           |           |
|---|-----------|-----------|-----------|
| C | 1.393922  | 0.000000  | 0.000000  |
| C | -1.393922 | 0.000000  | 0.000000  |
| C | 0.706134  | 0.000000  | 1.227750  |
| C | 0.706134  | 0.000000  | -1.227750 |
| C | -0.706134 | 0.000000  | 1.227750  |
| C | -0.706134 | 0.000000  | -1.227750 |
| C | 1.460012  | 0.000000  | 2.542527  |
| C | 1.460012  | 0.000000  | -2.542527 |
| C | -1.460012 | 0.000000  | 2.542527  |
| C | -1.460012 | 0.000000  | -2.542527 |
| H | 1.203457  | 0.886239  | 3.148638  |
| H | 1.203457  | -0.886239 | 3.148638  |
| H | 2.548363  | 0.000000  | 2.391608  |
| H | 1.203457  | 0.886239  | -3.148638 |
| H | 1.203457  | -0.886239 | -3.148638 |
| H | 2.548363  | 0.000000  | -2.391608 |
| H | -1.203457 | 0.886239  | 3.148638  |
| H | -1.203457 | -0.886239 | 3.148638  |
| H | -2.548363 | 0.000000  | 2.391608  |
| H | -1.203457 | 0.886239  | -3.148638 |
| H | -1.203457 | -0.886239 | -3.148638 |
| H | -2.548363 | 0.000000  | -2.391608 |
| C | 2.919949  | 0.000000  | 0.000000  |
| C | -2.919949 | 0.000000  | 0.000000  |
| O | 3.503237  | 1.134475  | 0.000000  |
| O | 3.503237  | -1.134475 | 0.000000  |
| O | -3.503237 | 1.134475  | 0.000000  |
| O | -3.503237 | -1.134475 | 0.000000  |

**(TMT,2H<sub>2</sub>O)<sup>2-</sup>@[Mo<sub>12</sub>O<sub>12</sub>S<sub>12</sub>(OH)<sub>12</sub>] (cis form; C<sub>1</sub> symmetry, Figure 7i)**

94 atoms; Bond energy: -615.5205 eV

|    |           |           |           |
|----|-----------|-----------|-----------|
| Mo | 5.847821  | -2.079211 | -0.057237 |
| Mo | 3.987269  | -4.241328 | -0.009316 |
| Mo | 0.852752  | -5.881917 | 0.047775  |
| Mo | -1.991154 | -6.294984 | 0.021356  |
| Mo | -5.016061 | -4.675849 | 0.019346  |
| Mo | -6.068469 | -2.020995 | -0.035165 |
| Mo | -5.737687 | 1.452224  | -0.047896 |
| Mo | -4.587767 | 4.041343  | -0.022329 |
| Mo | -1.584766 | 5.699566  | 0.033402  |
| Mo | 1.243159  | 5.404161  | 0.060151  |
| Mo | 4.288767  | 3.670980  | 0.024501  |
| Mo | 5.918227  | 1.339450  | -0.045470 |
| S  | 4.881690  | -3.081901 | 1.841876  |
| S  | 4.769906  | -3.066249 | -1.901923 |
| S  | -0.629224 | -5.885383 | 1.906520  |
| S  | -0.595681 | -5.803807 | -1.808898 |
| S  | -5.251159 | -3.194088 | 1.826595  |
| S  | -5.142341 | -3.231670 | -1.836754 |
| S  | -5.095527 | 2.697667  | 1.846874  |
| S  | -5.028378 | 2.704790  | -1.916099 |
| S  | -0.217195 | 5.094335  | 1.859123  |
| S  | -0.172938 | 5.184347  | -1.785370 |
| S  | 4.853055  | 2.307128  | 1.828220  |
| S  | 4.736726  | 2.322726  | -1.831411 |
| O  | 7.409683  | -2.763780 | -0.114564 |
| O  | 4.951314  | -5.648123 | -0.046563 |

Electronic Supplementary Information for Dalton Transactions  
This journal is © The Royal Society of Chemistry 2008

|   |           |           |           |
|---|-----------|-----------|-----------|
| O | 1.423617  | -7.483632 | 0.032445  |
| O | -2.110181 | -7.990498 | 0.006010  |
| O | -6.434785 | -5.609693 | 0.008958  |
| O | -7.742874 | -2.298918 | -0.085420 |
| O | -7.423920 | 1.722254  | -0.088785 |
| O | -5.880764 | 5.161086  | -0.034986 |
| O | -1.682700 | 7.393968  | 0.065441  |
| O | 1.745985  | 7.026620  | 0.119614  |
| O | 5.454314  | 4.905507  | 0.060352  |
| O | 7.464546  | 2.033250  | -0.118106 |
| O | 6.267719  | -0.353400 | 1.165516  |
| H | 5.737615  | -0.363660 | 1.984441  |
| O | 6.185362  | -0.342905 | -1.288695 |
| H | 5.605966  | -0.348616 | -2.073173 |
| O | 2.375989  | -4.947680 | 1.225838  |
| H | 2.508569  | -5.142545 | 2.170306  |
| O | 2.302586  | -4.914706 | -1.151339 |
| H | 2.052590  | -4.456503 | -1.972420 |
| O | -3.653896 | -5.732436 | 1.246542  |
| H | -3.393421 | -5.246045 | 2.051990  |
| O | -3.706894 | -5.847859 | -1.178940 |
| H | -3.514170 | -5.487568 | -2.063929 |
| O | -5.830759 | -0.331117 | 1.180688  |
| H | -5.201233 | -0.396267 | 1.924991  |
| O | -5.761706 | -0.341059 | -1.252420 |
| H | -5.128448 | -0.405606 | -1.993879 |
| O | -3.217283 | 5.146112  | 1.236444  |
| H | -2.970105 | 4.620909  | 2.020073  |
| O | -3.184189 | 5.177539  | -1.225617 |
| H | -2.916945 | 4.671852  | -2.015599 |
| O | 2.657057  | 4.313550  | 1.207457  |
| H | 2.457748  | 3.936971  | 2.083439  |
| O | 2.695218  | 4.439026  | -1.149370 |
| H | 2.463076  | 4.048676  | -2.011276 |
| O | 0.175779  | -3.399405 | 0.391561  |
| H | 1.037229  | -2.859579 | 0.204653  |
| H | 0.152787  | -3.508934 | 1.362580  |
| O | -2.354398 | -3.622750 | -0.125193 |
| H | -1.400597 | -3.340984 | 0.035116  |
| H | -2.566561 | -3.286803 | -1.018987 |
| O | 3.844052  | -0.617126 | 0.004060  |
| O | 2.432008  | -2.358704 | 0.015565  |
| O | -3.438591 | 0.772231  | -0.004542 |
| O | -2.539886 | 2.855193  | -0.005539 |
| C | 2.674693  | -1.095586 | 0.009492  |
| C | 1.439866  | -0.219959 | 0.004600  |
| C | 0.842578  | 0.117509  | 1.234423  |
| C | 0.830141  | 0.081151  | -1.228938 |
| C | -0.429372 | 0.729477  | 1.230632  |
| C | -0.438086 | 0.700078  | -1.230159 |
| C | -1.060855 | 0.986146  | -0.000585 |
| C | -2.457337 | 1.579679  | -0.003174 |
| C | 1.530605  | -0.196408 | 2.547932  |
| C | 1.501302  | -0.272041 | -2.540909 |
| H | 2.464223  | -0.757059 | 2.401854  |
| H | 2.439726  | -0.823634 | -2.390426 |
| H | 1.782113  | 0.729541  | 3.093589  |
| H | 1.738973  | 0.637106  | -3.119982 |
| H | 0.878171  | -0.788668 | 3.211857  |
| H | 0.842865  | -0.890795 | -3.174017 |
| C | -1.105269 | 1.079912  | 2.540471  |

|   |           |          |           |
|---|-----------|----------|-----------|
| C | -1.115730 | 1.034114 | -2.544136 |
| H | -2.117147 | 1.478615 | 2.384899  |
| H | -2.124688 | 1.442363 | -2.393469 |
| H | -1.186675 | 0.196933 | 3.197122  |
| H | -1.201994 | 0.143523 | -3.189984 |
| H | -0.526535 | 1.841760 | 3.091395  |
| H | -0.532574 | 1.783716 | -3.107327 |

(TMT,2H<sub>2</sub>O)<sup>2-</sup>@[Mo<sub>12</sub>O<sub>12</sub>S<sub>12</sub>(OH)<sub>12</sub>] (trans form; C<sub>1</sub> symmetry, Figure 7j)

94 atoms; Bond energy: -615.6294 eV

|    |           |           |           |
|----|-----------|-----------|-----------|
| Mo | -2.194942 | -0.050143 | -6.067646 |
| Mo | 0.626764  | -0.073467 | -5.672293 |
| Mo | 3.683189  | -0.097142 | -3.914669 |
| Mo | 5.576689  | -0.079024 | -1.766571 |
| Mo | -6.268481 | 0.010207  | -1.734748 |
| Mo | -5.161112 | -0.022573 | -4.353296 |
| Mo | -2.194942 | -0.050143 | 6.067646  |
| Mo | 0.626764  | -0.073467 | 5.672293  |
| Mo | 3.683189  | -0.097142 | 3.914669  |
| Mo | 5.576689  | -0.079024 | 1.766571  |
| Mo | -6.268481 | 0.010207  | 1.734748  |
| Mo | -5.161112 | -0.022573 | 4.353296  |
| S  | -0.821988 | -1.936534 | -5.730696 |
| S  | -0.794378 | 1.815160  | -5.745167 |
| S  | 4.453788  | -1.948613 | -2.633697 |
| S  | 4.498678  | 1.767781  | -2.713015 |
| S  | -5.370923 | -1.829649 | -2.854596 |
| S  | -5.371469 | 1.825373  | -2.902262 |
| S  | -0.821988 | -1.936534 | 5.730696  |
| S  | -0.794378 | 1.815160  | 5.745167  |
| S  | 4.453788  | -1.948613 | 2.633697  |
| S  | 4.498678  | 1.767781  | 2.713015  |
| S  | -5.370923 | -1.829649 | 2.854596  |
| S  | -5.371469 | 1.825373  | 2.902262  |
| O  | -2.449803 | -0.058531 | -7.756083 |
| O  | 1.263133  | -0.077281 | -7.253632 |
| O  | 4.738955  | -0.149061 | -5.249373 |
| O  | 7.133917  | -0.099331 | -2.450675 |
| O  | -7.943698 | 0.000376  | -2.020414 |
| O  | -6.587390 | -0.041868 | -5.273402 |
| O  | -2.449803 | -0.058531 | 7.756083  |
| O  | 1.263133  | -0.077281 | 7.253632  |
| O  | 4.738955  | -0.149061 | 5.249373  |
| O  | 7.133917  | -0.099331 | 2.450675  |
| O  | -7.943698 | 0.000376  | 2.020414  |
| O  | -6.587390 | -0.041868 | 5.273402  |
| O  | -3.884075 | -1.263191 | -5.478760 |
| H  | -3.593801 | -2.061674 | -4.999594 |
| O  | -3.875502 | 1.189548  | -5.504312 |
| H  | -3.581984 | 1.996261  | -5.040871 |
| O  | 2.110347  | -1.283332 | -4.717148 |
| H  | 1.929029  | -2.199595 | -4.446995 |
| O  | 2.134148  | 1.116919  | -4.698874 |
| H  | 1.869443  | 1.931168  | -4.235747 |
| O  | -3.884075 | -1.263191 | 5.478760  |
| H  | -3.593801 | -2.061674 | 4.999594  |

Electronic Supplementary Information for Dalton Transactions  
This journal is © The Royal Society of Chemistry 2008

|   |           |           |           |
|---|-----------|-----------|-----------|
| O | -3.875502 | 1.189548  | 5.504312  |
| H | -3.581984 | 1.996261  | 5.040871  |
| O | 2.110347  | -1.283332 | 4.717148  |
| H | 1.929029  | -2.199595 | 4.446995  |
| O | 2.134148  | 1.116919  | 4.698874  |
| H | 1.869443  | 1.931168  | 4.235747  |
| O | 5.721004  | -1.249739 | 0.000000  |
| H | 5.281666  | -2.120577 | 0.000000  |
| O | 5.627286  | 1.104254  | 0.000000  |
| H | 5.089409  | 1.920059  | 0.000000  |
| O | -6.005700 | -1.159133 | 0.000000  |
| H | -5.603417 | -2.045558 | 0.000000  |
| O | -6.014275 | 1.193856  | 0.000000  |
| H | -5.602118 | 2.075787  | 0.000000  |
| O | 2.090423  | -0.109260 | -2.003706 |
| H | 1.158999  | -0.098199 | -2.406920 |
| H | 2.207778  | -1.008804 | -1.645220 |
| O | 2.090423  | -0.109260 | 2.003706  |
| H | 1.158999  | -0.098199 | 2.406920  |
| H | 2.207778  | -1.008804 | 1.645220  |
| O | -2.346428 | -0.031429 | -3.639193 |
| O | -0.119914 | -0.041160 | -3.328355 |
| O | -2.346428 | -0.031429 | 3.639193  |
| O | -0.119914 | -0.041160 | 3.328355  |
| C | -1.324595 | -0.034277 | -2.891684 |
| C | -1.478066 | -0.031949 | -1.385887 |
| C | -1.522578 | -1.263832 | -0.705670 |
| C | -1.461254 | 1.199552  | -0.705342 |
| C | -1.540116 | -2.574724 | -1.465941 |
| C | -1.396502 | 2.510341  | -1.461374 |
| H | -1.432302 | -2.424744 | -2.549292 |
| H | -1.369321 | 2.359081  | -2.549325 |
| H | -2.486791 | -3.117126 | -1.298721 |
| H | -2.270559 | 3.144012  | -1.233147 |
| H | -0.726533 | -3.242179 | -1.133675 |
| H | -0.498171 | 3.084684  | -1.176993 |
| C | -1.324595 | -0.034277 | 2.891684  |
| C | -1.478066 | -0.031949 | 1.385887  |
| C | -1.522578 | -1.263832 | 0.705670  |
| C | -1.461254 | 1.199552  | 0.705342  |
| C | -1.540116 | -2.574724 | 1.465941  |
| C | -1.396502 | 2.510341  | 1.461374  |
| H | -1.432302 | -2.424744 | 2.549292  |
| H | -1.369321 | 2.359081  | 2.549325  |
| H | -2.486791 | -3.117126 | 1.298721  |
| H | -2.270559 | 3.144012  | 1.233147  |
| H | -0.726533 | -3.242179 | 1.133675  |
| H | -0.498171 | 3.084684  | 1.176993  |

**(TMT, 3H<sub>2</sub>O)<sup>2-</sup>@[Mo<sub>12</sub>O<sub>12</sub>S<sub>12</sub>(OH)<sub>12</sub>] (C<sub>s</sub> symmetry, Figure 7k)**

97 atoms; Bond energy: -630.2830 eV

|    |           |           |           |
|----|-----------|-----------|-----------|
| Mo | -2.190713 | -0.036329 | -6.078034 |
| Mo | 0.634425  | -0.092388 | -5.690648 |
| Mo | 3.726993  | -0.128578 | -3.979270 |
| Mo | 5.528267  | -0.045058 | -1.743125 |
| Mo | -6.267608 | 0.008110  | -1.736598 |

Electronic Supplementary Information for Dalton Transactions  
This journal is © The Royal Society of Chemistry 2008

|    |           |           |           |
|----|-----------|-----------|-----------|
| Mo | -5.154892 | -0.011369 | -4.354165 |
| Mo | -2.190713 | -0.036329 | 6.078034  |
| Mo | 0.634425  | -0.092388 | 5.690648  |
| Mo | 3.726993  | -0.128578 | 3.979270  |
| Mo | 5.528267  | -0.045058 | 1.743125  |
| Mo | -6.267608 | 0.008110  | 1.736598  |
| Mo | -5.154892 | -0.011369 | 4.354165  |
| S  | -0.837644 | -1.936803 | -5.754731 |
| S  | -0.766859 | 1.809298  | -5.749792 |
| S  | 4.447944  | -1.938341 | -2.612326 |
| S  | 4.497968  | 1.765283  | -2.832409 |
| S  | -5.361228 | -1.824621 | -2.862134 |
| S  | -5.369077 | 1.828548  | -2.894067 |
| S  | -0.837644 | -1.936803 | 5.754731  |
| S  | -0.766859 | 1.809298  | 5.749792  |
| S  | 4.447944  | -1.938341 | 2.612326  |
| S  | 4.497968  | 1.765283  | 2.832409  |
| S  | -5.361228 | -1.824621 | 2.862134  |
| S  | -5.369077 | 1.828548  | 2.894067  |
| O  | -2.449850 | -0.029214 | -7.765456 |
| O  | 1.269793  | -0.107709 | -7.272349 |
| O  | 4.787310  | -0.236221 | -5.305091 |
| O  | 7.126661  | -0.002807 | -2.328138 |
| O  | -7.941144 | -0.001479 | -2.030110 |
| O  | -6.580821 | -0.025168 | -5.274705 |
| O  | -2.449850 | -0.029214 | 7.765456  |
| O  | 1.269793  | -0.107709 | 7.272349  |
| O  | 4.787310  | -0.236221 | 5.305091  |
| O  | 7.126661  | -0.002807 | 2.328138  |
| O  | -7.941144 | -0.001479 | 2.030110  |
| O  | -6.580821 | -0.025168 | 5.274705  |
| O  | -3.882505 | -1.245188 | -5.491959 |
| H  | -3.594734 | -2.051802 | -5.024979 |
| O  | -3.863801 | 1.206753  | -5.495097 |
| H  | -3.567904 | 2.007639  | -5.023268 |
| O  | 2.093043  | -1.293368 | -4.687672 |
| H  | 2.036977  | -2.262635 | -4.629329 |
| O  | 2.159807  | 1.075860  | -4.731785 |
| H  | 1.960992  | 1.939261  | -4.327956 |
| O  | -3.882505 | -1.245188 | 5.491959  |
| H  | -3.594734 | -2.051802 | 5.024979  |
| O  | -3.863801 | 1.206753  | 5.495097  |
| H  | -3.567904 | 2.007639  | 5.023268  |
| O  | 2.093043  | -1.293368 | 4.687672  |
| H  | 2.036977  | -2.262635 | 4.629329  |
| O  | 2.159807  | 1.075860  | 4.731785  |
| H  | 1.960992  | 1.939261  | 4.327956  |
| O  | 5.807844  | -1.247762 | 0.000000  |
| H  | 5.396032  | -2.130986 | 0.000000  |
| O  | 5.184458  | 1.071653  | 0.000000  |
| H  | 4.264834  | 1.553891  | 0.000000  |
| O  | -6.012180 | -1.164756 | 0.000000  |
| H  | -5.599305 | -2.046172 | 0.000000  |
| O  | -6.023728 | 1.189408  | 0.000000  |
| H  | -5.627267 | 2.078379  | 0.000000  |
| O  | 2.044867  | -0.052969 | -1.983279 |
| H  | 1.122264  | -0.085593 | -2.430008 |
| H  | 2.211461  | -0.957330 | -1.652282 |
| O  | 2.044867  | -0.052969 | 1.983279  |
| H  | 1.122264  | -0.085593 | 2.430008  |
| H  | 2.211461  | -0.957330 | 1.652282  |

|   |           |           |           |
|---|-----------|-----------|-----------|
| O | 2.691390  | 1.846707  | 0.000000  |
| H | 2.397678  | 1.292199  | -0.770534 |
| H | 2.397678  | 1.292199  | 0.770534  |
| O | -2.337868 | -0.023049 | -3.642112 |
| O | -0.113365 | -0.070434 | -3.336013 |
| O | -2.337868 | -0.023049 | 3.642112  |
| O | -0.113365 | -0.070434 | 3.336013  |
| C | -1.317273 | -0.046970 | -2.894340 |
| C | -1.470408 | -0.047167 | -1.387031 |
| C | -1.516672 | -1.279226 | -0.705924 |
| C | -1.455105 | 1.184351  | -0.705818 |
| C | -1.536724 | -2.590302 | -1.466241 |
| C | -1.392355 | 2.496021  | -1.460238 |
| H | -1.424701 | -2.440734 | -2.549406 |
| H | -1.349244 | 2.345346  | -2.547824 |
| H | -2.486140 | -3.129197 | -1.301626 |
| H | -2.276866 | 3.119392  | -1.244009 |
| H | -0.726202 | -3.260396 | -1.131684 |
| H | -0.504289 | 3.078776  | -1.162238 |
| C | -1.317273 | -0.046970 | 2.894340  |
| C | -1.470408 | -0.047167 | 1.387031  |
| C | -1.516672 | -1.279226 | 0.705924  |
| C | -1.455105 | 1.184351  | 0.705818  |
| C | -1.536724 | -2.590302 | 1.466241  |
| C | -1.392355 | 2.496021  | 1.460238  |
| H | -1.424701 | -2.440734 | 2.549406  |
| H | -1.349244 | 2.345346  | 2.547824  |
| H | -2.486140 | -3.129197 | 1.301626  |
| H | -2.276866 | 3.119392  | 1.244009  |
| H | -0.726202 | -3.260396 | 1.131684  |
| H | -0.504289 | 3.078776  | 1.162238  |

(Trimesate)<sup>3-</sup>@[Mo<sub>12</sub>O<sub>12</sub>S<sub>12</sub>(OH)<sub>12</sub>] (C<sub>2v</sub> symmetry, Figure 71)

78 atoms; Bond energy: -541.5208 eV

|    |           |           |           |
|----|-----------|-----------|-----------|
| Mo | 0.000000  | -4.526386 | 4.255202  |
| Mo | 0.000000  | 4.352134  | -4.151422 |
| Mo | 0.000000  | -1.416379 | 5.827200  |
| Mo | 0.000000  | 1.427297  | -6.042641 |
| Mo | 0.000000  | 1.416379  | 5.827200  |
| Mo | 0.000000  | -1.427297 | -6.042641 |
| Mo | 0.000000  | 4.526386  | 4.255202  |
| Mo | 0.000000  | -4.352134 | -4.151422 |
| Mo | 0.000000  | 5.957021  | 1.782809  |
| Mo | 0.000000  | -5.766605 | -1.696637 |
| Mo | 0.000000  | -5.957021 | 1.782809  |
| Mo | 0.000000  | 5.766605  | -1.696637 |
| S  | -1.820594 | -4.885304 | 2.812645  |
| S  | 1.882108  | 4.977406  | -2.876639 |
| S  | 1.820594  | -4.885304 | 2.812645  |
| S  | -1.882108 | 4.977406  | -2.876639 |
| S  | -1.882166 | 0.000000  | 5.733246  |
| S  | 1.819904  | 0.000000  | -5.623146 |
| S  | 1.882166  | 0.000000  | 5.733246  |
| S  | -1.819904 | 0.000000  | -5.623146 |
| S  | 1.820594  | 4.885304  | 2.812645  |
| S  | -1.882108 | -4.977406 | -2.876639 |
| S  | -1.820594 | 4.885304  | 2.812645  |
| S  | 1.882108  | -4.977406 | -2.876639 |

Electronic Supplementary Information for Dalton Transactions  
This journal is © The Royal Society of Chemistry 2008

|   |           |           |           |
|---|-----------|-----------|-----------|
| O | 0.000000  | -5.789809 | 5.397324  |
| O | 0.000000  | 5.528197  | -5.399488 |
| O | 0.000000  | -1.909752 | 7.469629  |
| O | 0.000000  | 1.774310  | -7.709894 |
| O | 0.000000  | 1.909752  | 7.469629  |
| O | 0.000000  | -1.774310 | -7.709894 |
| O | 0.000000  | 5.789809  | 5.397324  |
| O | 0.000000  | -5.528197 | -5.399488 |
| O | 0.000000  | 7.576869  | 2.309041  |
| O | 0.000000  | -7.435617 | -2.091214 |
| O | 0.000000  | -7.576869 | 2.309041  |
| O | 0.000000  | 7.435617  | -2.091214 |
| O | 1.229036  | -3.040727 | 5.089375  |
| H | 1.951020  | -2.736596 | 4.509076  |
| O | -1.230299 | 2.900298  | -5.186982 |
| H | -1.951849 | 2.553562  | -4.630509 |
| O | -1.229036 | -3.040727 | 5.089375  |
| H | -1.951020 | -2.736596 | 4.509076  |
| O | 1.230299  | 2.900298  | -5.186982 |
| H | 1.951849  | 2.553562  | -4.630509 |
| O | 1.229036  | 3.040727  | 5.089375  |
| H | 1.951020  | 2.736596  | 4.509076  |
| O | -1.230299 | -2.900298 | -5.186982 |
| H | -1.951849 | -2.553562 | -4.630509 |
| O | -1.229036 | 3.040727  | 5.089375  |
| H | -1.951020 | 2.736596  | 4.509076  |
| O | 1.230299  | -2.900298 | -5.186982 |
| H | 1.951849  | -2.553562 | -4.630509 |
| O | 1.229256  | -5.939583 | 0.079244  |
| H | 1.952034  | -5.285873 | 0.105673  |
| O | -1.229256 | 5.939583  | 0.079244  |
| H | -1.952034 | 5.285873  | 0.105673  |
| O | -1.229256 | -5.939583 | 0.079244  |
| H | -1.952034 | -5.285873 | 0.105673  |
| O | 1.229256  | 5.939583  | 0.079244  |
| H | 1.952034  | 5.285873  | 0.105673  |
| O | 0.000000  | 2.460979  | -2.737538 |
| O | 0.000000  | -1.134522 | 3.484449  |
| O | 0.000000  | 1.134522  | 3.484449  |
| O | 0.000000  | -2.460979 | -2.737538 |
| O | 0.000000  | -3.593389 | -0.771313 |
| O | 0.000000  | 3.593389  | -0.771313 |
| C | 0.000000  | -1.208199 | 0.688307  |
| H | 0.000000  | -2.149597 | 1.231601  |
| C | 0.000000  | 1.215635  | -0.711047 |
| C | 0.000000  | 0.000000  | 1.394325  |
| C | 0.000000  | 0.000000  | -1.404627 |
| H | 0.000000  | 0.000000  | -2.491538 |
| C | 0.000000  | -1.215635 | -0.711047 |
| C | 0.000000  | 1.208199  | 0.688307  |
| H | 0.000000  | 2.149597  | 1.231601  |
| C | 0.000000  | 2.519648  | -1.462086 |
| C | 0.000000  | 0.000000  | 2.898778  |
| C | 0.000000  | -2.519648 | -1.462086 |
